# Supplementary material for: Fe–N4 and Co–N4 dual sites for boosting oxygen electroreduction in Zn–air batteries
Source: Royal Society of Chemistry journal article supplement (doi:10.1039/d1ta03176g), 2021-01-01
Supplement: d1ta03176g1.pdf [file d1ta03176g1.pdf]

**Electronic Supplementary Information (ESI)**

**Fe-N<sub>4</sub> and Co-N<sub>4</sub> dual sites for boosting oxygen electroreduction in Zn-air batteries**

Dan Wang,<sup>a</sup> Hao Xu,<sup>a</sup> Peixia Yang,<sup>\* a</sup> Xiangyu Lu,<sup>a</sup> Jingyuan Ma,<sup>\* b</sup> Ruopeng Li,<sup>a</sup> Lihui Xiao,<sup>a</sup> Jinqiu Zhang,<sup>a</sup> Maozhong An,<sup>a</sup>

<sup>a</sup> MIIT Key Laboratory of Critical Materials Technology for New Energy Conversion and Storage, School of Chemistry and Chemical Engineering, Harbin Institute of Technology, 150001 Harbin, China.

<sup>b</sup> Shanghai Synchrotron Radiation Facility, Zhangjiang Laboratory (SSRF, ZJLab), Shanghai Advanced Research Institute, Chinese Academy of Sciences, Shanghai, 201204 China

\*E-mail: yangpeixia@hit.edu.cn; majy@sari.ac.cn

## Characterization

The detailed morphology of materials was observed by scanning electron microscopy (SEM, Quanta 200FEG) and transmission electron microscopy (TEM, FEI Talos F200x). The structure of the samples was investigated by a Bruker D8 diffractometer X-ray diffraction (XRD). Raman spectra were recorded by a Raman spectrometer (HR800, JY Company). The Brunauer-Emmett-Teller (BET) surface area and pore size distribution were evaluated by recording nitrogen adsorption-desorption isotherms using a gas adsorption analyzer (Bei Shi De 3H-2000PS1). X-ray absorption spectra at Fe K-edge and Co K-edge were performed on the BL14W1 beam line at the Shanghai Synchrotron Radiation Facility (SSRF), Shanghai Advanced Research Institute, China<sup>1</sup>. The EXAFS raw data were background subtracted, normalized, Fourier transformed, and fitted by the standard procedures using the Athena and Artemis software packages<sup>2</sup>. X-ray photoelectron spectroscopy (XPS) were collected on a Physical Electronics PHI model 5700 instrument. Binding energy of all samples was calibrated with respect to the standard C1s binding energy (284.8 eV).

## Electrochemical measurements

The polarization curve test for ORR was performed in N<sub>2</sub>- or O<sub>2</sub>-saturated 0.1 M KOH solution at a scan rate of 10 mV s<sup>-1</sup>. The ORR polarization curves were recorded at different rotating rates ranging from 900 to 2500 rpm. The electron transfer number (*n*) was calculated according to the Koutecky-Levich equation:

$$\frac{1}{j} = \frac{1}{j_L} + \frac{1}{j_K} = \frac{1}{\frac{1}{B\omega^2}} + \frac{1}{j_K} \quad (1)$$

$$B = 0.2nFC_O D_O^{\frac{2}{3}} \nu^{-\frac{1}{6}} \quad (2)$$

where *j* is the measured current density (mA cm<sup>-2</sup>), *j<sub>L</sub>* and *j<sub>K</sub>* are the diffusion-limited and kinetics current densities (mA cm<sup>-2</sup>), respectively,  $\omega$  is the rotation rate of the RDE (rpm), *F* is the Faraday constant (96485 C mol<sup>-1</sup>), *C<sub>O</sub>* is the bulk concentration of O<sub>2</sub> in 0.1 M KOH (1.2 × 10<sup>-6</sup> mol cm<sup>-3</sup>), *D<sub>O</sub>* is the diffusion coefficient of O<sub>2</sub> in 0.1 M KOH and 0.1 M HClO<sub>4</sub> solution (1.9 × 10<sup>-5</sup> cm<sup>2</sup> s<sup>-1</sup>), and  $\nu$  is the kinematic viscosity of the electrolyte (0.01 cm<sup>2</sup> s<sup>-1</sup>).

The specific kinetic current density was also calculated from the K-L equation:

$$j_K = \frac{j_L \times j}{j_L - j} \quad (3)$$

In addition, rotating ring-disk electrode (RRDE) tests were applied to evaluate the hydrogen peroxide yield ( $\text{H}_2\text{O}_2\%$ ) and the electron transfer number ( $n$ ) based on the equations as follows:

$$\text{H}_2\text{O}_2(\%) = 200 \frac{I_R/N}{I_D + I_R/N} \quad (4)$$

$$n = 4 \frac{I_D}{I_D + I_R/N} \quad (5)$$

where  $I_D$  and  $I_R$  are disk and ring current, respectively,  $N$  is the collection efficiency of the Pt ring (37%).

Turnover frequency (TOF) of the Co-N-C, Fe-N-C and FeCo-N-C were calculated using the equation:

$$\text{TOF} = \frac{j \times a}{4 \times m \times F} \quad (6)$$

Where  $j$  is the measured current density at 0.9 V,  $a$  is the surface area of the RDE ( $0.196 \text{ cm}^2$ ), 4 is the electron transfer number of ORR,  $m$  is the mole number of active Co atomic sites, Fe atomic sites, and dual atomic sites on the RDE, and  $F$  is the Faraday constant ( $F = 96485 \text{ C mol}^{-1}$ ).

Electrochemical impedance spectroscopy (EIS) measurements were carried out in a frequency range of 100 kHz to 0.01Hz with an AC voltage with 5 mV amplitude.

The stability of samples was evaluated by accelerated durability test (ADT). The alkaline and acidic ORR ADT was performed by applying potential cycling between 1.0 and 0.6 V vs. RHE at a scan rate of  $50 \text{ mV s}^{-1}$  for 5000 cycles in  $\text{O}_2$ -saturated 0.1 M KOH and 0.1 M  $\text{HClO}_4$ , respectively.

## Computational details

The adsorption energy ( $E_{\text{ads}}$ ) of the adsorbates on the studied Co-N<sub>4</sub>, Fe-N<sub>4</sub>, and Fe-N<sub>4</sub>&Co-N<sub>4</sub> site was defined as

$$E_{\text{ads}} = E_{\text{total}} - E_{\text{mol}} - E_{\text{sub}} \quad (7)$$

where  $E_{\text{total}}$ ,  $E_{\text{mol}}$ , and  $E_{\text{sub}}$  are the total energies of the molecules adsorbed on Co-N<sub>4</sub>, Fe-N<sub>4</sub>, and Fe-N<sub>4</sub>&Co-N<sub>4</sub> site, the isolated adsorbate molecules, and adsorption substrate (Co-N<sub>4</sub>, Fe-N<sub>4</sub>, and Fe-N<sub>4</sub>&Co-N<sub>4</sub> site), respectively<sup>3</sup>. The free energy of the ORR intermediates was calculated by the thermodynamic model proposed by Nørkov et al.<sup>4</sup>.

$$\Delta G = \Delta E + \Delta ZPE + T\Delta S + \Delta G_U + \Delta G_{\text{pH}} + \Delta G_{\text{field}} \quad (8)$$

where  $\Delta E$  is the reaction energy obtained from the DFT calculations,  $\Delta ZPE$  is the zero-point energy,  $\Delta S$  is the entropy, and  $\Delta G_U = -neU$ , where  $n$  is the electron transfer number and  $U$  is the applied potential (vs. RHE). In this work,  $\Delta G_{\text{pH}}$  and  $\Delta G_{\text{field}}$  are not involved.

## Zn-air battery tests

The liquid Zn-air battery tests were performed at room temperature. The catalyst layer was prepared as follows: FeCo-N-C (2.5 mg), acetylene black (1 mg), activated carbon (4 mg), and Nafion (5 wt%, 8  $\mu\text{L}$ ) were dispersed in 200  $\mu\text{L}$  of isopropyl alcohol followed by sonicating for 20 min to form a homogeneous catalyst ink; Ni foams as the substrate were immersed in 1 M HCl solution and then washed with ethanol and ultrapure water before use; the catalyst ink was dropped onto the Ni foam with a mass loading of 2 mg  $\text{cm}^{-2}$  and then dried in vacuum at 50  $^{\circ}\text{C}$  for 12 h. The commercial Pt/C (20 wt%) was used as catalyst layer for comparison with the same loading. A polished zinc foil was employed as the anode, while 6 M KOH solution was employed as the electrolyte. The polarization curves test was carried out on a CHI760E electrochemical workstation. The galvanostatic discharge test was performed in the LAND CT2001A testing system.

The all-solid-state Zn-air battery was assembled by a polished zinc foil as anode, and a piece of Ni foam coated by catalyst as cathode. The gel polymer as solid electrolyte was prepared following the procedures: 5 g polyvinyl alcohol (PVA) was added into 45 mL H<sub>2</sub>O under vigorously stirring; and then 5 mL KOH solution (1 g  $\text{mL}^{-1}$ ) was poured into the above solution and stirred for 40 min at 95  $^{\circ}\text{C}$ . Subsequently, the gel was spread in a culture dish and frozen for 6 h, and

placed at room temperature for 10 h. The zinc foil and catalyst coated Ni foam were placed on the two sides of PVA gel film wetted by 6 M KOH electrolyte. The catalyst loading of the all-solid-state Zn-air battery was the same as that of the liquid Zn-air battery.

### References

- 1 H. S. Yu, X. J. Wei, J. Li, S. Q. Gu, S. Zhang, L. H. Wang, J. Y. Ma, L. N. Li, Q. Gao, R. Si, F. F. Sun, Y. Wang, F. Song, H. J. Xu, X. H. Yu, Y. Zou, J. Q. Wang, Z. Jiang and Y. Y. Huang, *Nuclear Science and Techniques* 2015, 26, 050102.
- 2 M. Newville, *Journal of Synchrotron Radiation*, 2001, 8, 322-324.
- 3 H. Xu, D. Wang, P. Yang, A. Liu, R. Li, Y. Li, L. Xiao, J. Zhang and M. An, *Physical Chemistry Chemical Physics*, 2020, DOI: 10.1039/D0CP04676K.
- 4 A. A. Peterson, F. Abild-Pedersen, F. Studt, J. Rossmeisl and J. K. Nørskov, *Energy Environ. Sci.*, 2010, 3, 1311-1315.



**Fig. S1** SEM images of ZIF-8.



**Fig. S2** SEM images of (a, b) Co-N-C, (c, d) Fe-N-C and (e, f) FeCo-N-C.



**Fig. S3** (a-c) TEM and (d) HRTEM images of Co-N-C.



**Fig. S4** (a-c) TEM and (d) HRTEM images of Fe-N-C.



**Fig. S5** Comparison between the fitting results and experimental FT-EXAFS data at Fe K-edge for (a) FeCo-N-C and (b) standard Fe foil. Comparison between the fitting results and experimental FT-EXAFS data at Co K-edge for (c) FeCo-N-C and (d) standard Co foil.



**Fig. S6** High-resolution Fe 2p XPS spectrum of FeCo-N-C.



**Fig. S7** High-resolution Co 2p XPS spectrum of FeCo-N-C.



**Fig. S8** CV curves for Co-N-C, Fe-N-C and FeCo-N-C catalysts at a scan rate of 50 mV s<sup>-1</sup> in O<sub>2</sub> and N<sub>2</sub>-saturated 0.1 M KOH, respectively.



**Fig. S9** The electrochemical impedance spectroscopy of Co-N-C, Fe-N-C and FeCo-N-C.



**Fig. S10** CV curves for (a) Co-N-C, (b) Fe-N-C and (c) FeCo-N-C at different scan rates of 5, 10, 15, 20 and 25 mV s<sup>-1</sup> in O<sub>2</sub>-saturated 0.1 M KOH. (d) Plots of current densities (at 1.1 V vs. RHE) as a function of scan rates.



**Fig. S11** The  $j_k@0.9$  V with respect to  $C_{dl}$  for Co-N-C, Fe-N-C and FeCo-N-C.



**Fig. S12** ORR polarization curves at different rotating rates in 0.1 M KOH. Inset: the fitted K-L plots and electron transfer numbers.



**Fig. S13** Peroxide yields and the electron transfer number ( $n$ ) for FeCo-N-C and 20% Pt/C.



**Fig. S14** ORR polarization curves of 20% Pt/C at 1600 rpm with a scan rate of 10 mV s<sup>-1</sup> before and after 5000-cycle ORR ADT in 0.1 M KOH.



**Fig. S15** Chronoamperometric response of FeCo-N-C and 20% Pt/C at 0.75 V under rotation speed of 1600 rpm after adding methanol in 0.1 M KOH.



**Fig. S16** The  $j_k$  at 0.8 V and  $E_{1/2}$  for Co-N-C, Fe-N-C, FeCo-N-C and 20% Pt/C in 0.1 M HClO<sub>4</sub>.



**Fig. S17** Tafel plots for Co-N-C, Fe-N-C, FeCo-N-C and 20% Pt/C in 0.1 M  $\text{HClO}_4$ .



**Fig. S18** ORR polarization curves at different rotating rates in 0.1 M HClO<sub>4</sub>. Inset: the fitted K-L plots and electron transfer numbers.



**Fig. S19** ORR polarization curves of 20% Pt/C at 1600 rpm with a scan rate of 10 mV s<sup>-1</sup> before and after 5000-cycle ORR ADT in 0.1 M HClO<sub>4</sub>.



**Fig. S20** Structure of (a) Co-N<sub>4</sub>, (b) Fe-N<sub>4</sub>, and (c) Fe-N<sub>4</sub>&Co-N<sub>4</sub> sites where gray, blue, orange and green balls represent carbon, nitrogen, cobalt, and iron atoms, respectively.



**Fig. S21** (a) Energy levels of the HOMO and LUMO, along with the energy gap between them. (b) Density of state of Co-N<sub>4</sub>, Fe-N<sub>4</sub>, and Fe-N<sub>4</sub>&Co-N<sub>4</sub>.



**Fig. S22** (a, c, e, g) Top view and (b, d, f, h) side view of the adsorption configurations of the ORR intermediates on the surface of Co-N<sub>4</sub> site where gray, blue, orange, red, and white balls represent carbon, nitrogen, cobalt, oxygen, and hydrogen atoms, respectively.



**Fig. S23** (a, c, e, g) Top view and (b, d, f, h) side view of the adsorption configurations of the ORR intermediates on the surface of Fe-N<sub>4</sub> site where gray, blue, green, red, and white balls represent carbon, nitrogen, iron, oxygen, and hydrogen atoms, respectively.



**Fig. S24** Top view of the adsorption configurations of the ORR intermediates on the surface of Fe-N<sub>4</sub>&Co-N<sub>4</sub> site where gray, blue, orange, green, red, and white balls represent carbon, nitrogen, cobalt, iron, oxygen, and hydrogen atoms, respectively.



**Fig. S25** Free energy diagram for the Co-N<sub>4</sub>, Fe-N<sub>4</sub> and Fe-N<sub>4</sub>&Co-N<sub>4</sub> systems during the ORR under alkaline condition at (a)  $U = 0$  and (b)  $U = 1.23$  V, respectively.



**Fig. S26** Free energy diagram for the Co-N<sub>4</sub>, Fe-N<sub>4</sub> and Fe-N<sub>4</sub>&Co-N<sub>4</sub> systems during the ORR under acidic condition at (a)  $U = 0$  and (b)  $U = 1.23$  V, respectively.



**Fig. S27** Discharge curves of the liquid Zn-air batteries using FeCo-N-C and 20% Pt/C as air cathode at a current density of 20 mA cm<sup>-2</sup>.



**Fig. S28** A digital image of as-prepared flexible PVA gel film.



**Fig. S29** A digital image of all-solid-state Zn-air battery exhibiting a minimum open-circuit voltage of  $\approx 1.370$  measured with a multimeter.

**Table S1.** Structural parameters extracted from the fitting EXAFS results at Fe K-edge ( $S_0^2=0.726$ ) and Co K-edge ( $S_0^2=0.727$ ).

| sample   | Scattering path | N   | R( $\text{\AA}$ ) | $\sigma^2$<br>( $10^{-3}\text{\AA}^2$ ) | $\Delta E_0$<br>(eV) | R factor |
|----------|-----------------|-----|-------------------|-----------------------------------------|----------------------|----------|
| Fe foil  | Fe-Fe           | 8   | 2.46              | 5.0                                     | 5.0                  | 0.0058   |
|          | Fe-Fe           | 6   | 2.85              | 5.2                                     | 4.8                  |          |
| FeCo-N-C | Fe-N            | 4.2 | 2.00              | 5.0                                     | -1.3                 | 0.0025   |
| Co foil  | Co-Co           | 12  | 2.49              | 6.0                                     | 7.3                  | 0.0021   |
| FeCo-N-C | Co-N            | 3.7 | 1.92              | 6.3                                     | 2.0                  | 0.0097   |

$S_0^2$ : amplitude reduction factor; N: coordination number; R: interatomic distance;  $\sigma^2$ : Debye-aller factor;  $\Delta E_0$ : energy shift; R factor is used to value the goodness of the fitting.

**Table S2.** The content of C, N, O, Fe and Co of the prepared catalysts obtained from XPS.

|          | Atomic Concentration % |      |      |      |      | Mass Concentration % |      |      |      |      |
|----------|------------------------|------|------|------|------|----------------------|------|------|------|------|
|          | C                      | N    | O    | Fe   | Co   | C                    | N    | O    | Fe   | Co   |
| Co-N-C   | 86.60                  | 5.74 | 7.29 | —    | 0.37 | 82.62                | 6.38 | 9.26 | —    | 1.74 |
| Fe-N-C   | 88.75                  | 5.43 | 5.40 | 0.42 | —    | 85.15                | 6.08 | 6.91 | 1.86 | —    |
| FeCo-N-C | 86.17                  | 6.68 | 6.69 | 0.12 | 0.34 | 81.99                | 7.41 | 8.48 | 0.54 | 1.57 |

**Table S3.** A comparison table of the ORR performance between this work and recently reported bimetal catalysts in alkaline and acidic media.

| Materials        | $E_{1/2}$ (V) (vs. | $E_{1/2}$ (V) (vs.              | References                                     |
|------------------|--------------------|---------------------------------|------------------------------------------------|
|                  | RHE) in 0.1 M KOH  | RHE) in 0.1 M HClO <sub>4</sub> |                                                |
| FeCo-N-C         | 0.904              | 0.807                           | This work                                      |
| FeCo-IA/NC       | 0.88               | —                               | J. Mater. Chem. A,<br>2020, 8, 4369            |
| Fe-Cu-N/C        | 0.89               | 0.71                            | Nano Energy, 2017, 37,<br>187-194              |
| FeCo-N-C-700     | 0.896              | —                               | J. Mater. Chem. A,<br>2020, 8, 9355            |
| Zn/CoN-C         | 0.861              | 0.796                           | Angew. Chem. Int. Ed.,<br>2019, 58, 2622-2626  |
| CuCo@NC          | 0.884              | —                               | Adv. Energy Mater.,<br>2017, 7, 1700193        |
| CoPNi-N/C        | 0.81               | 0.70                            | Appl. Catal. B Environ.,<br>2019, 240, 112-121 |
| 2D ZnCoFe/NC-850 | 0.831              | —                               | J. Power Sources, 2019,<br>434, 226717         |
| Fe, Mn-N/C       | 0.904              | —                               | J. Mater. Chem. A,<br>2018, 6, 13254           |

---

|          |       |      |                                                   |
|----------|-------|------|---------------------------------------------------|
| FeCo-NC  | 0.855 | 0.63 | Int. J. Hydrogen Energy,<br>2018, 43, 14701-14709 |
| CoNi/BCF | 0.80  | —    | Appl. Catal. B Environ.,<br>2019, 240, 193-200    |

---

**Table S4** Adsorption energies (eV) of ORR intermediates on Co-N<sub>4</sub>, Fe-N<sub>4</sub>, and Fe-N<sub>4</sub>&Co-N<sub>4</sub> sites, respectively.

|                                      | *O <sub>2</sub> | *OOH  | *O    | *OH   |
|--------------------------------------|-----------------|-------|-------|-------|
| Co-N <sub>4</sub>                    | -0.77           | -1.35 | -3.07 | -2.89 |
| Fe-N <sub>4</sub>                    | -1.47           | -1.97 | -4.50 | -3.08 |
| Fe-N <sub>4</sub> &Co-N <sub>4</sub> | -1.29           | -1.88 | -4.24 | -3.02 |

**Table S5.** The Bader charge (in e) for metal atoms in Co-N<sub>4</sub>, Fe-N<sub>4</sub>, and Fe-N<sub>4</sub>&Co-N<sub>4</sub>, structures, respectively.

| Structure                            | Co    | Fe    |
|--------------------------------------|-------|-------|
| Co-N <sub>4</sub>                    | 0.454 | —     |
| Fe-N <sub>4</sub>                    | —     | 0.502 |
| Fe-N <sub>4</sub> &Co-N <sub>4</sub> | 0.389 | 0.489 |

**Table S6.** A summary of the performance of liquid and all-solid-state Zn-air batteries with M-N-C catalysts.

| Materials    | liquid Zn-air batteries                   |                                                        |                                                     | all-solid-state Zn-air batteries          | References                                  |
|--------------|-------------------------------------------|--------------------------------------------------------|-----------------------------------------------------|-------------------------------------------|---------------------------------------------|
|              | Peak power density (mW cm <sup>-2</sup> ) | specific capacity (mAh·g <sub>Zn</sub> <sup>-1</sup> ) | Energy density (Wh kg <sub>Zn</sub> <sup>-1</sup> ) | Peak power density (mW cm <sup>-2</sup> ) |                                             |
| FeCo-N-C     | 196.3                                     | 728.6                                                  | 936.3                                               | 128.2                                     | This work                                   |
| CoNi/BCF     | 155.1                                     | 710.9                                                  | 853.1                                               | —                                         | Appl. Catal. B Environ., 2019, 240, 193-200 |
| FeCo-N-C-700 | 150                                       | 518                                                    | —                                                   | —                                         | J. Mater. Chem. A, 2020, 8, 9355-9363       |
| SilkNC/KB    | 91.2                                      | 614.7                                                  | 727.6                                               | 32.3                                      | Chem. Mater. 2019, 31, 1023-1029            |
| NGM-Co       | 152                                       | 750                                                    | 840                                                 | ~28                                       | Adv. Mater. 2017, 29, 1703185               |
| FeCo-IA/NC   | 115.6                                     | 635.3                                                  | 725.6                                               | —                                         | J. Mater. Chem. A, 2020, 8, 4369-4375       |
| (Fe,Co)/CNT  | 260                                       | 774                                                    | 870                                                 | —                                         | Energy Environ. Sci., 2018, 11, 3375-3379   |

---

|                   |       |       |       |   |                                          |
|-------------------|-------|-------|-------|---|------------------------------------------|
| Fe@C-<br>NG/NCNTs | 101.3 | 682.6 | 764.5 | — | J. Mater. Chem. A,<br>2018, 6, 516-526   |
| 3C-900            | ~97   | 727   | 819   | — | J. Mater. Chem. A,<br>2018, 6, 3730-3737 |

---
